# Supplementary material
Source: PubMed Central journal article supplement (PMC4676524)
Supplement: supp_115.181453_FigureS1.pdf [file supp_115.181453_FigureS1.pdf]

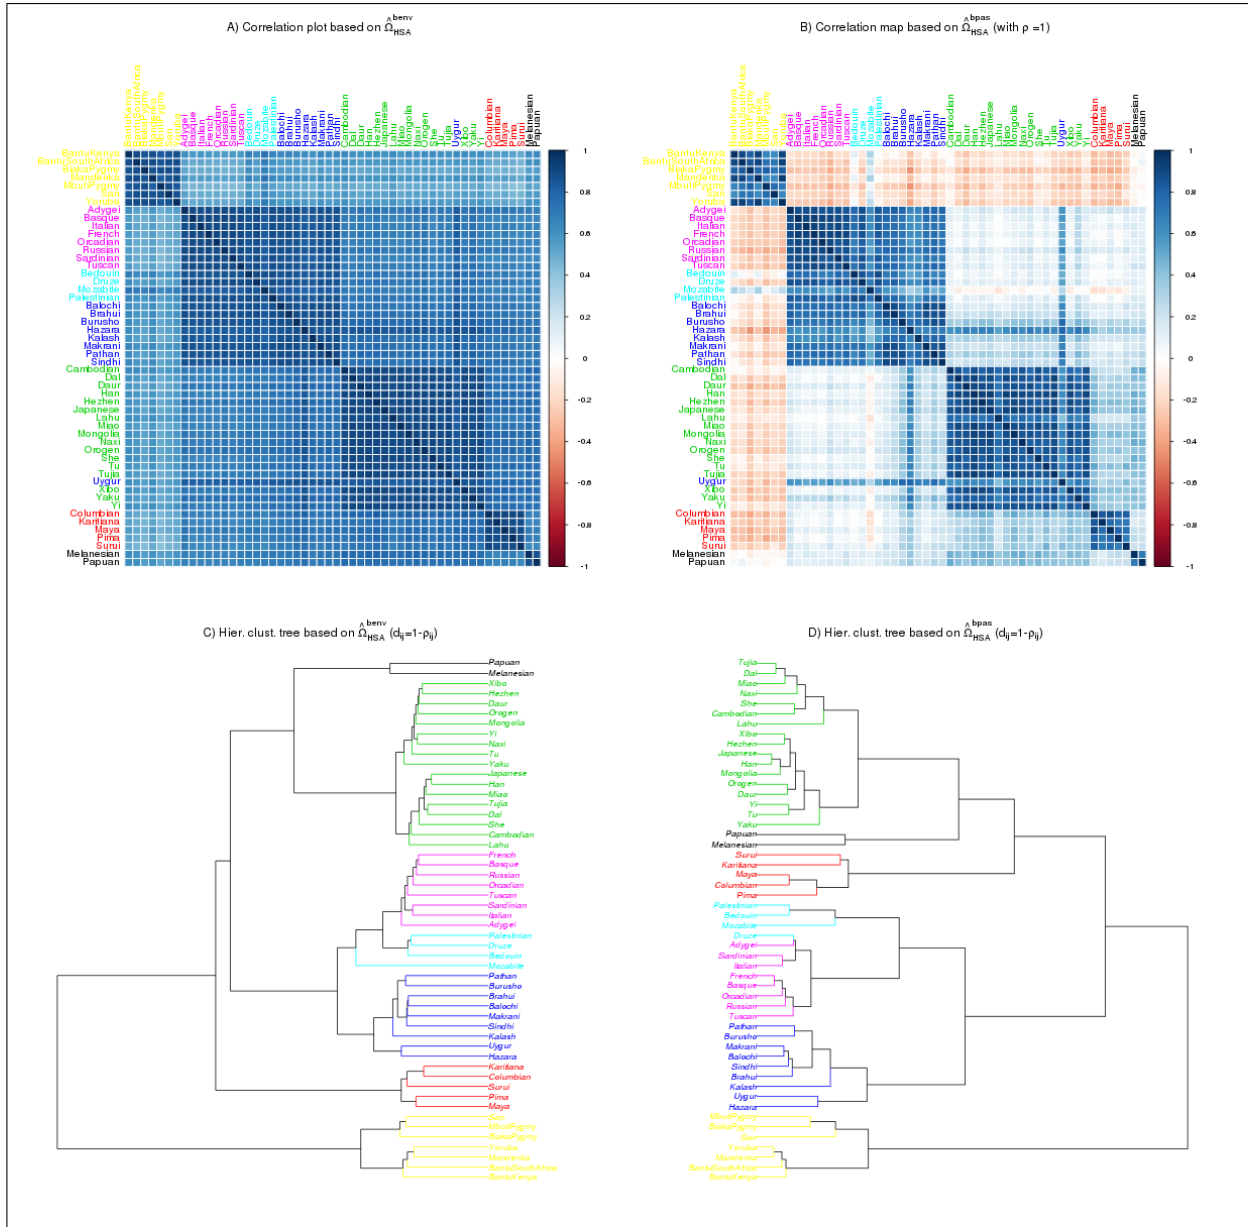

Figure S1: Representation of the scaled covariance matrices  $\hat{\Omega}$  among 52 human populations  $\hat{\Omega}_{HSA}^{benv}$  (A and C) as estimated from BAYENV2 (Coop *et al.*, 2010) and  $\hat{\Omega}_{HSA}^{bpas}$  (B and D) as estimated from BAYPASS under the core model with  $\rho = 1$ . Both estimates are based on the analysis of the HSA<sub>SNP</sub> data set consisting of 2,333 autosomal SNPs (see the main text). Population codes (and branches) are colored according to the broad group origins as defined in Conrad *et al.* (2006) (see Günther and Coop (2013))
