# Supplementary material
Source: PubMed Central journal article supplement (PMC4676524)
Supplement: supp_115.181453_FigureS3.pdf [file supp_115.181453_FigureS3.pdf]

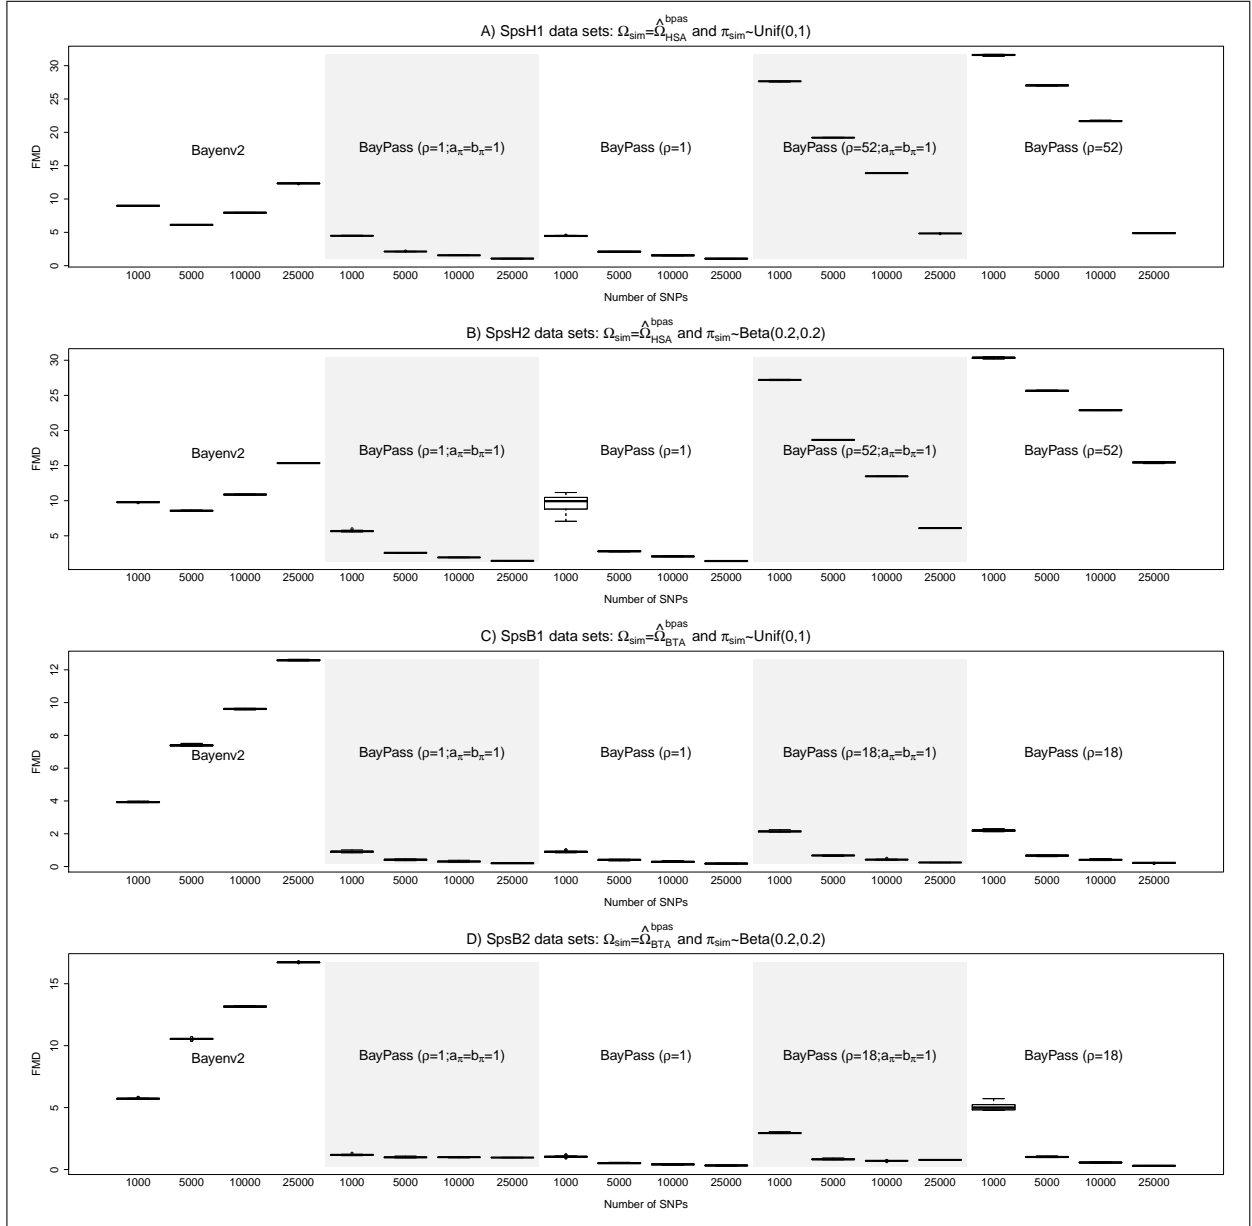

Figure S3: FMD distances (Förstner and Moonen, 2003) between the matrices used to simulate the data sets ( $\widehat{\Omega}_{HSA}^{b pas}$  or  $\widehat{\Omega}_{BTA}^{b pas}$ ) and their estimates obtained with BAYENV2 (Coop *et al.*, 2010) and four alternative BAYPASS model parameterizations (i)  $\rho = 1$ ; ii)  $\rho = 1$  and  $a_{\pi} = b_{\pi} = 1$ ; iii)  $\rho = J$  and ; iv)  $\rho = J$  and  $a_{\pi} = b_{\pi} = 1$ ). Each boxplot contains 10 FMD distances computed with estimates from 10 independent data sets simulated with the same parameters (scenarios SpsH1, SpsH2, SpsB1 or SpsB2; and 1,000, 5,000, 10,000 or 25,000 markers). In total, 160 different data sets were thus considered (10 replicates  $\times$  4 scenarios  $\times$  4 SNP numbers).
