# Supplementary material
Source: PubMed Central journal article supplement (PMC4676524)
Supplement: supp_115.181453_FigureS4.pdf [file supp_115.181453_FigureS4.pdf]

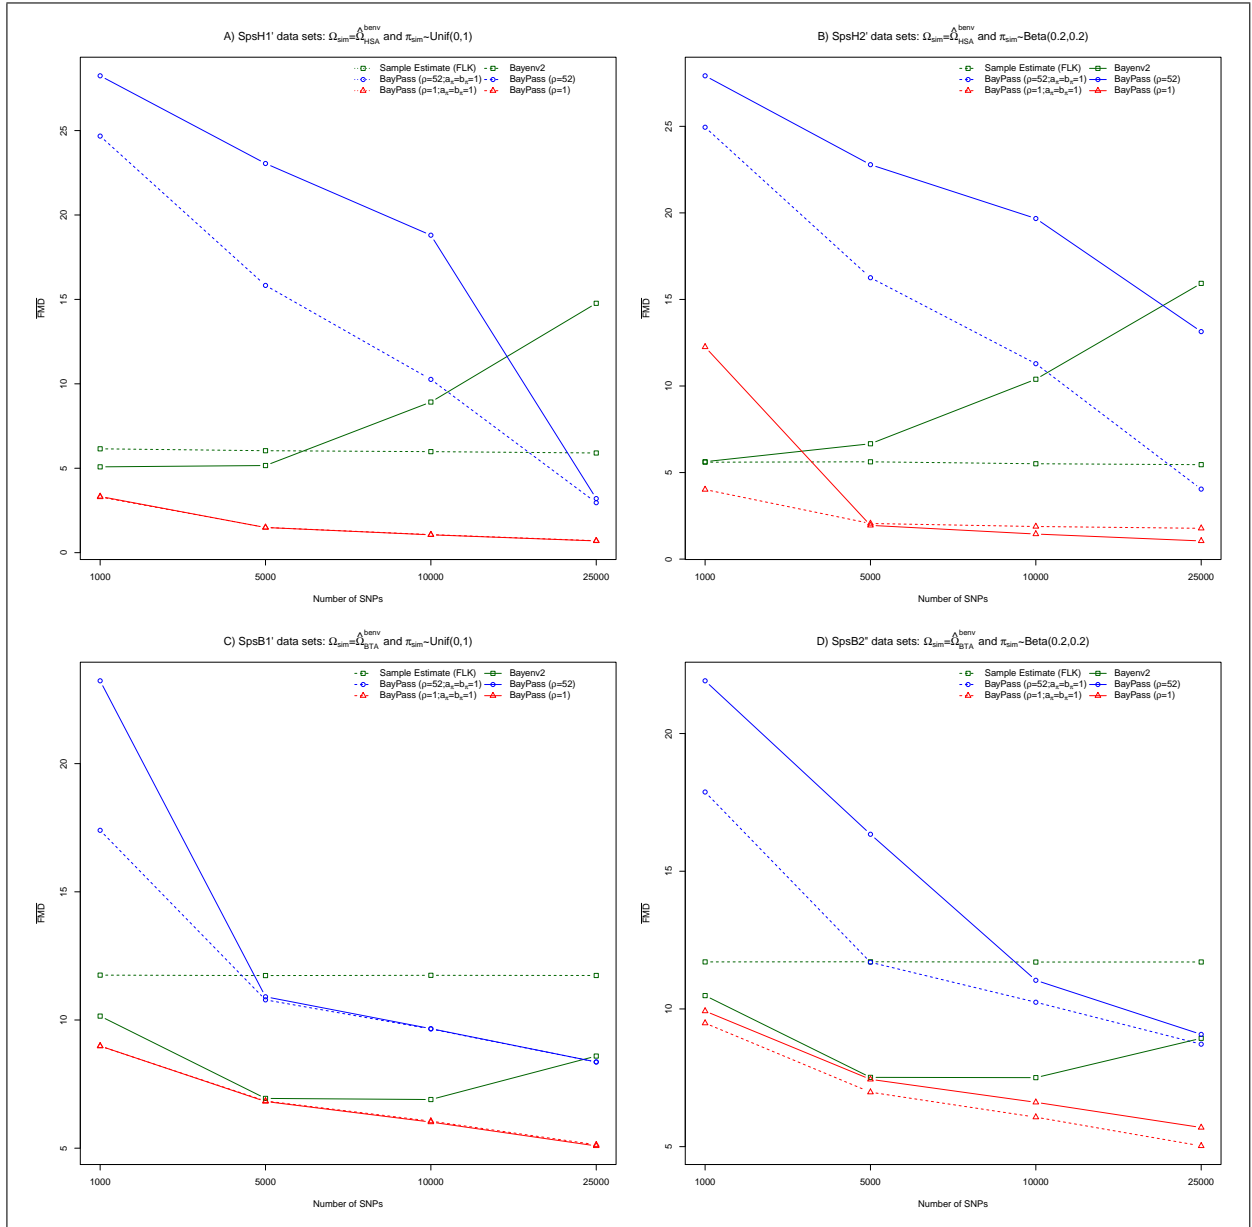

Figure S4: FMD distances (Förstner and Moonen, 2003) between the matrices used to simulate the data sets and their estimates. Simulation scenarios are defined according to the matrix  $\Omega_{sim}$  used to simulated the data ( $\Omega_{HSA}^{benv}$  in A and B; and  $\Omega_{BTA}^{benv}$  in C and D) and the parameters of the Beta distribution used to sample the simulated ancestral allele frequencies  $\pi_i$  (Unif(0,1) in A and C; and Beta(0.2,0.2) in B and D). For each scenario, ten independent data sets of 1,000, 5,000, 10,000 and 25,000 markers were simulated (160 data sets in total) and analyzed with BAYENV2 (Coop *et al.*, 2010) and four alternative BAYPASS model parameterizations (i)  $\rho = 1$ ; ii)  $\rho = 1$  and  $a_\pi = b_\pi = 1$ ; iii)  $\rho = J$  and ; iv)  $\rho = J$  and  $a_\pi = b_\pi = 1$ ). As a matter of comparisons, the FLK frequentist estimate (Bonhomme *et al.*, 2010) of the covariance matrices was also computed. Each point in the curves is the average of the ten pairwise FMD distances between the underlying  $\Omega_{sim}$  and each of the  $\widehat{\Omega}$  estimated in the ten corresponding simulation replicates.
