# Supplementary material
Source: PubMed Central journal article supplement (PMC4676524)
Supplement: supp_115.181453_FigureS9.pdf [file supp_115.181453_FigureS9.pdf]

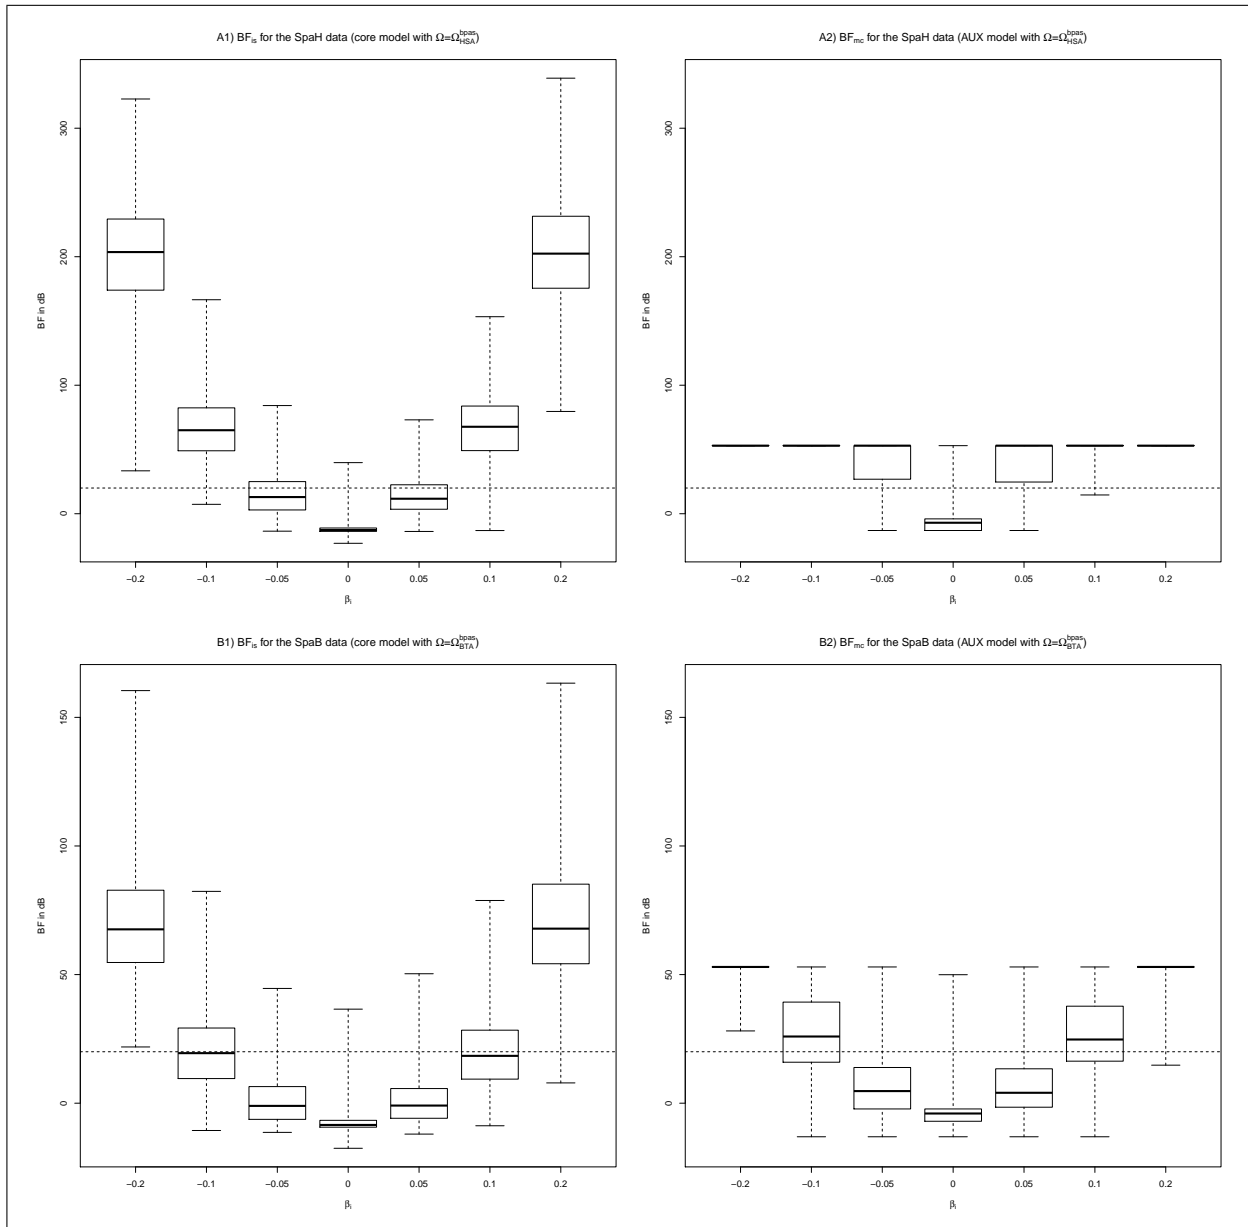

Figure S9: Distribution of the  $BF_{is}$  (estimated under the core model) and the  $BF_{mc}$  (estimated under the AUX model) expressed in dB units as a function of the regression coefficients  $\beta_i$  of the underlying SNPs. For a given scenario (SpaH and SpaB), results from the ten replicates are combined.
