# Supplementary material
Source: PubMed Central journal article supplement (PMC4676524)
Supplement: supp_115.181453_FigureS10.pdf [file supp_115.181453_FigureS10.pdf]

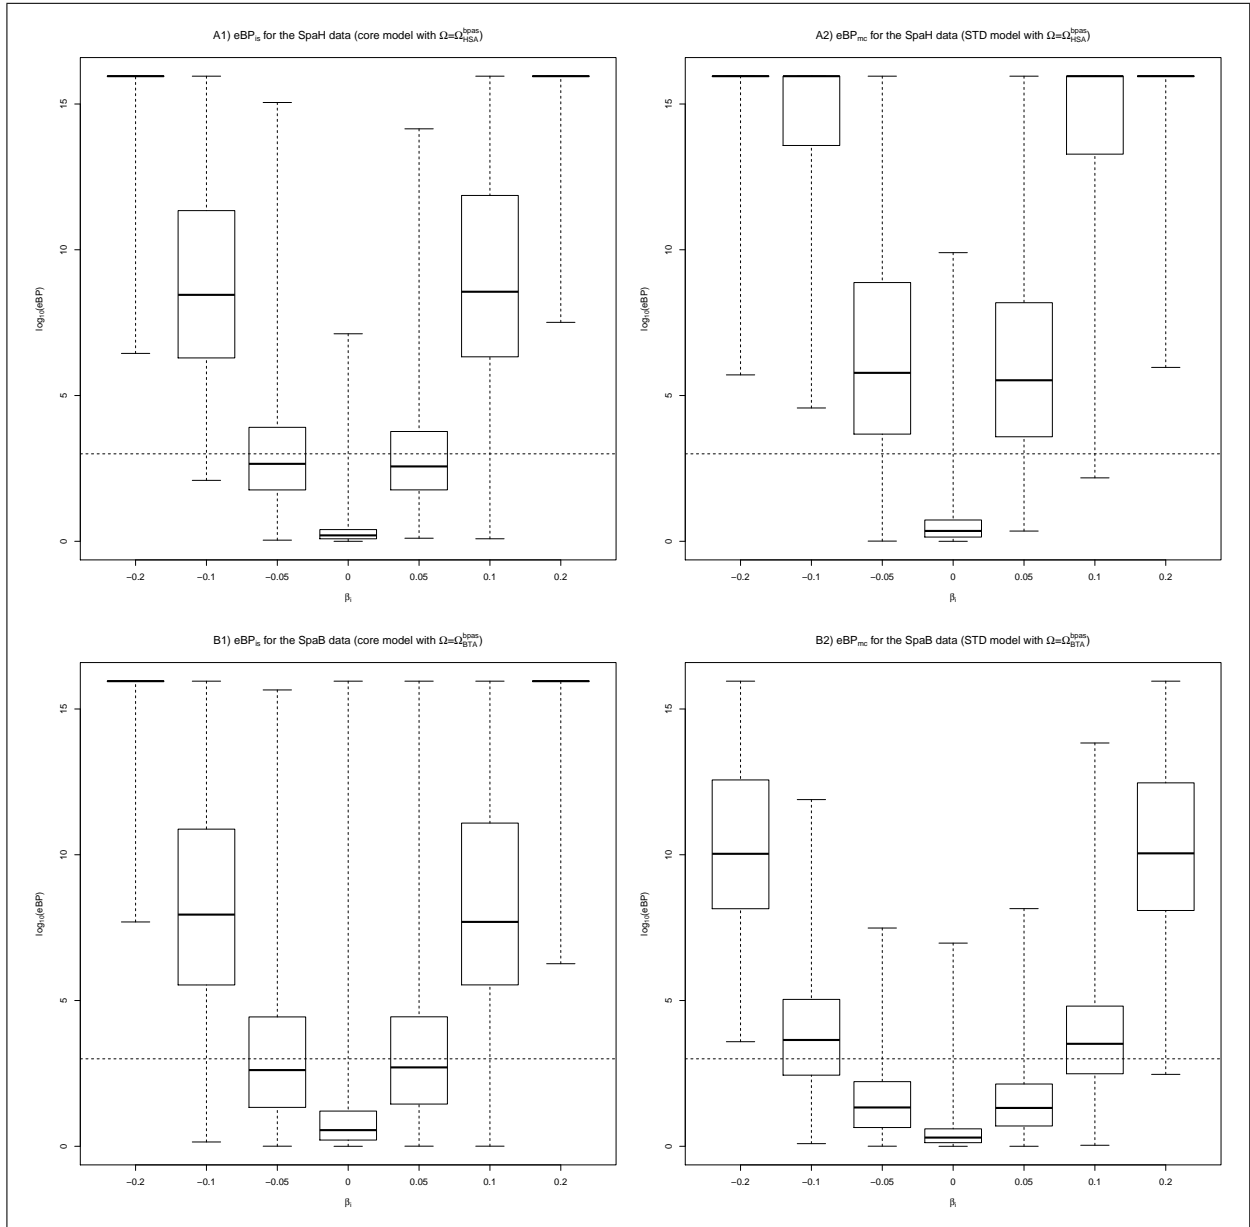

Figure S10: Distribution of the eBP<sub>is</sub> (estimated under the core model) and the eBP<sub>mc</sub> (estimated under the STD model) as a function of the regression coefficients  $\beta_i$  of the underlying SNPs. For a given scenario (SpaH and SpaB), results from the ten replicates are combined.
