# Supplementary material
Source: PubMed Central journal article supplement (PMC4676524)
Supplement: supp_115.181453_FigureS11.pdf [file supp_115.181453_FigureS11.pdf]

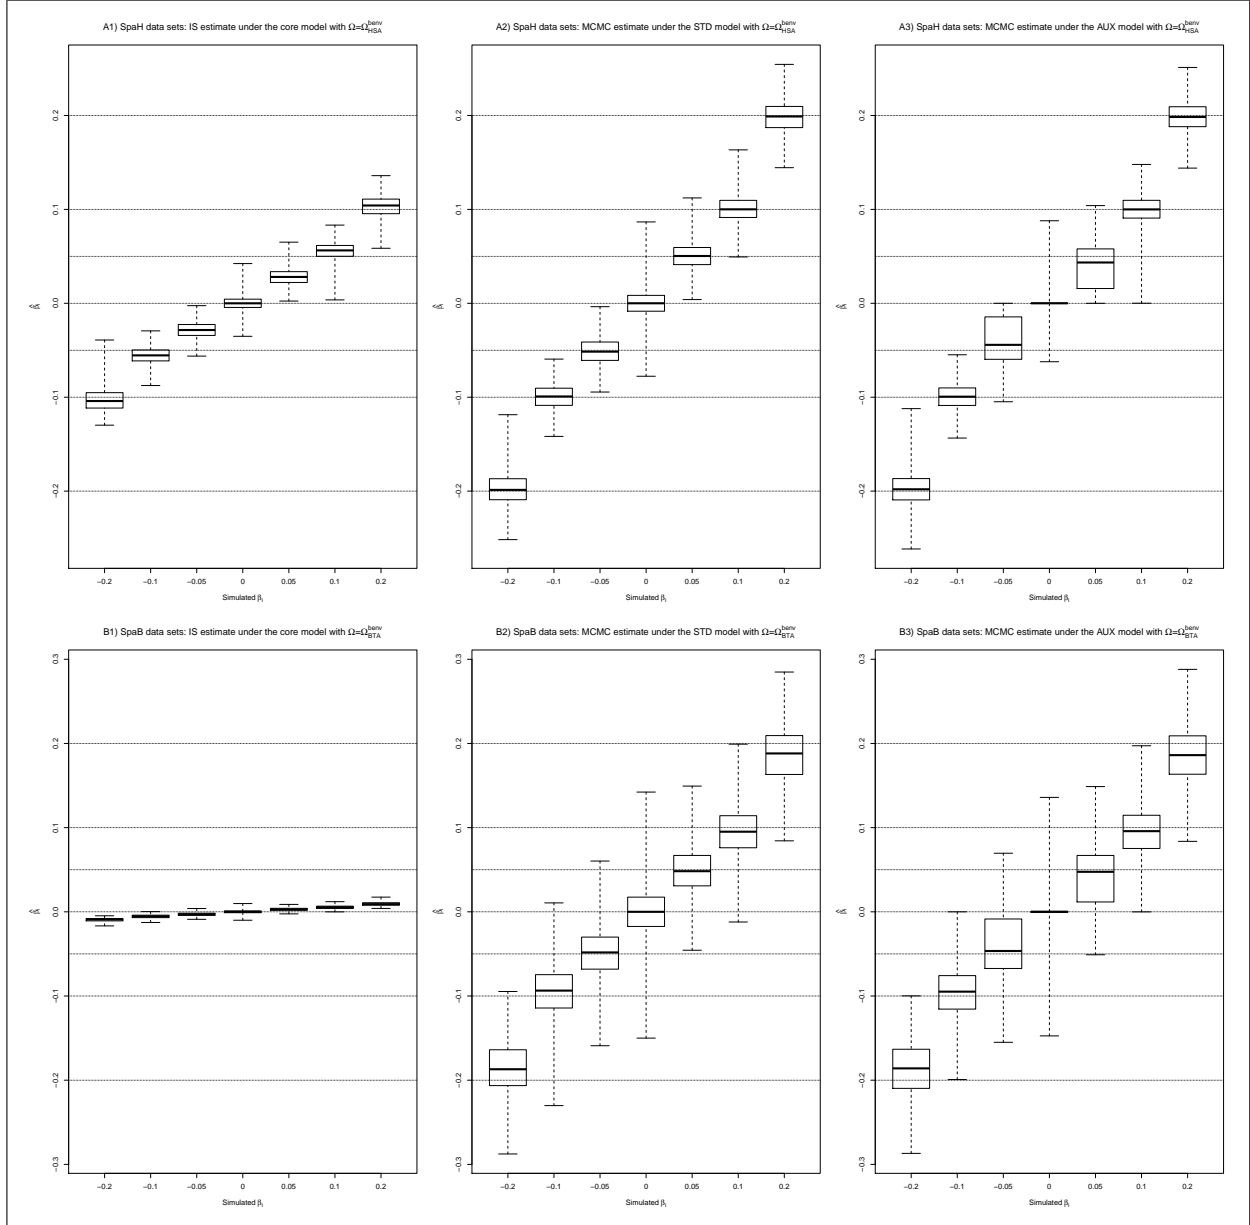

Figure S11: Distribution of the estimated regression coefficients  $\beta_i$  of the SNPs as a function of their actual simulated values from analyses under three different model parameterizations with  $\Omega = \hat{\Omega}_{HSA}^{benv}$  (for SpaH data) and  $\Omega = \hat{\Omega}_{BTA}^{benv}$  (for SpaB data). For a given scenario (SpaH and SpaB), results from the ten replicates are combined.
