# Supplementary material
Source: PubMed Central journal article supplement (PMC4676524)
Supplement: supp_115.181453_FigureS15.pdf [file supp_115.181453_FigureS15.pdf]

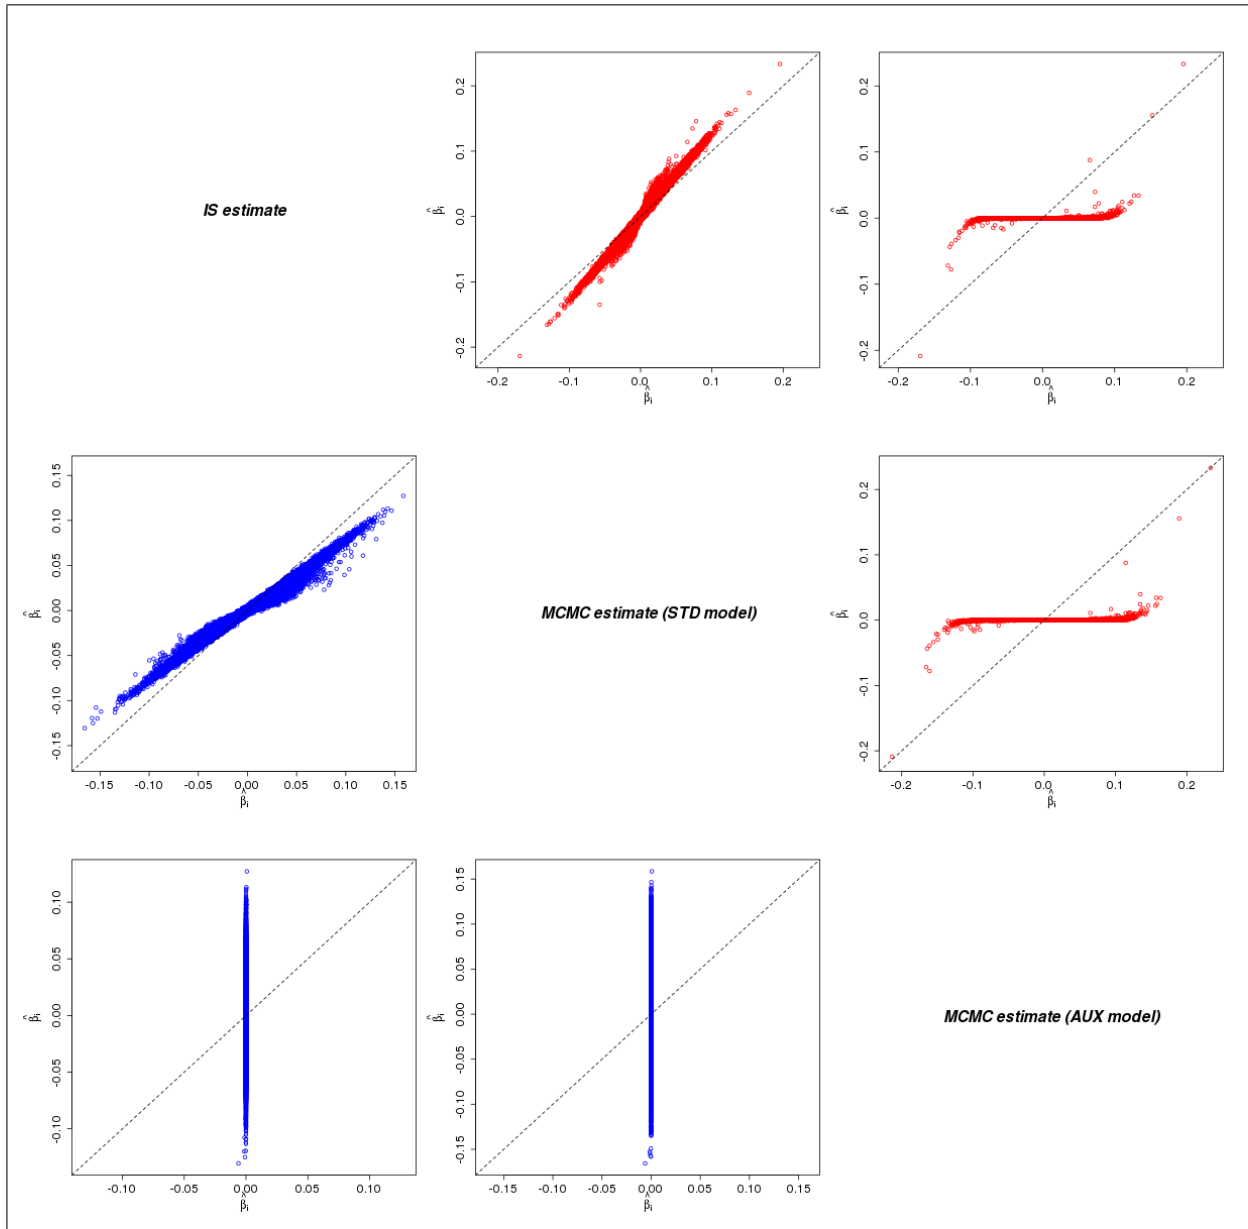

Figure S15: Comparison of the estimates of the individual SNP regression coefficients ( $\beta_i$ ) on the population SMS (lower diagonal panels of the scatterplot in blue) and piebald pattern (upper diagonal panels of the scatterplot in red) based on i) the Importance Sampling algorithm, ii) the posterior mean computed from the MCMC samples generated under the STD model and iii) the posterior mean computed from the MCMC samples generated under the AUX model.
