# Supplementary material
Source: PubMed Central journal article supplement (PMC4676524)
Supplement: supp_115.181453_FigureS16.pdf [file supp_115.181453_FigureS16.pdf]

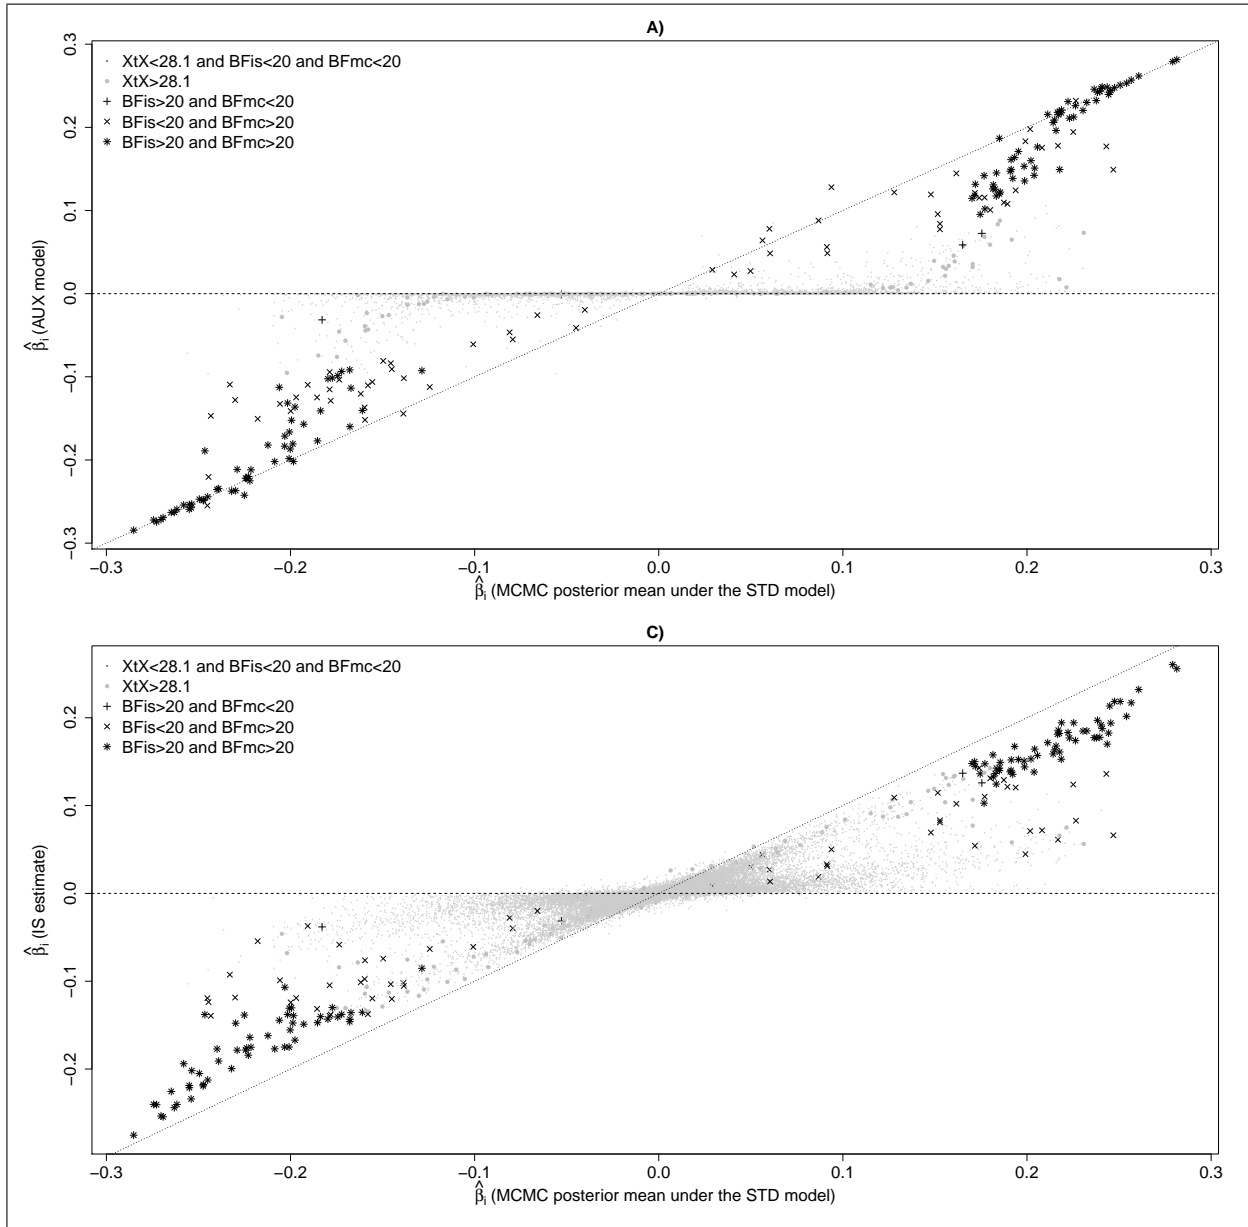

Figure S16: Comparison of the estimates of the individual SNP regression coefficients ( $\beta_i$ ) on the ecotype population covariable based on i) the Importance Sampling algorithm, ii) the posterior mean computed from the MCMC samples generated under the STD model and iii) the posterior mean computed from the MCMC samples generated under the AUX model. The point symbols nomenclature is the same as in the main text.
