# Supplementary material
Source: PubMed Central journal article supplement (PMC4676524)
Supplement: supp_115.181453_FileS4.pdf [file supp_115.181453_FileS4.pdf]

## File S4: Cattle breed-specific covariables

The table S4.1 below gives details about each of the 18 cattle breeds from the  $BTA_{\text{snp}}$  data set.

| Breed Code | Breed Name            | Region of Origin                    | Sample Size | SMS     | Piebald pattern |
|------------|-----------------------|-------------------------------------|-------------|---------|-----------------|
| ABO        | Abondance             | South-Eastern France (Alps)         | 22          | -0.2542 | 1               |
| AUB        | Aubrac                | Southern France (Massif Central)    | 22          | -0.5484 | -1              |
| BLO        | Blonde d'Aquitaine    | South-Western France                | 29          | 2.0671  | -1              |
| BPN        | Bretonne Pie-Noir     | North-Western France (Brittany)     | 18          | -2.0859 | 1               |
| BRU        | French Brown Swiss    | Switzerland (Alps)                  | 18          | -0.098  | -1              |
| CHA        | Charolaise            | Center France (Burgundy)            | 20          | 0.3208  | -1              |
| GAS        | Gasconne              | South-Western France (Pyrénées)     | 22          | -0.2549 | -1              |
| HOL        | French Holstein       | Northern Europe                     | 30          | 0.7083  | 1               |
| JER        | Jersiaise             | Jersey Island                       | 21          | -1.7698 | -1              |
| LIM        | Limousine             | Center France                       | 44          | 0.1509  | -1              |
| MAN        | Rouge des Prés        | North-Western France                | 46          | 1.3074  | 1               |
| MAR        | Maraîchine            | North-Western France                | 19          | 0.3085  | -1              |
| MON        | Montbéliarde          | Eastern France (Jura)               | 30          | 0.411   | 1               |
| NOR        | Normande              | North-Western France                | 30          | 0.6308  | 1               |
| PRP        | Pie Rouge des Plaines | North-Western France (Brittany)     | 22          | 0.398   | 1               |
| SAL        | Salers                | Southern of France (Massif Central) | 22          | 0.364   | -1              |
| TAR        | Tarine                | South-Eastern France (Alps)         | 18          | -1.0961 | -1              |
| VOS        | Vosgienne             | Eastern France (Vosges)             | 20          | -0.5595 | 1               |

Table S4.1: Origin, sample size, Synthetic Morphology Scores (SMS) and piebald pattern (1 for pied breed and -1 for breed with a uniform color pattern) of the 18 cattle breeds.

The Synthetic Morphology Score (SMS) covariable was derived from a Principal Component Analysis (see Figure S4.1 below) of the average Female Weight, Female Withers Height, Male Height and Male Withers Height of each breed as reported in the French BRG website (<http://www.brg.prd.fr/>). More precisely, the SMS corresponds to the scaled first principal components that explained 88.0% of the variance.

## References

Dray, S., and A. Dufour, 2007 The ade4 package: implementing the duality diagram for ecologists. *Journal of Statistical Software* 22: 1–20.

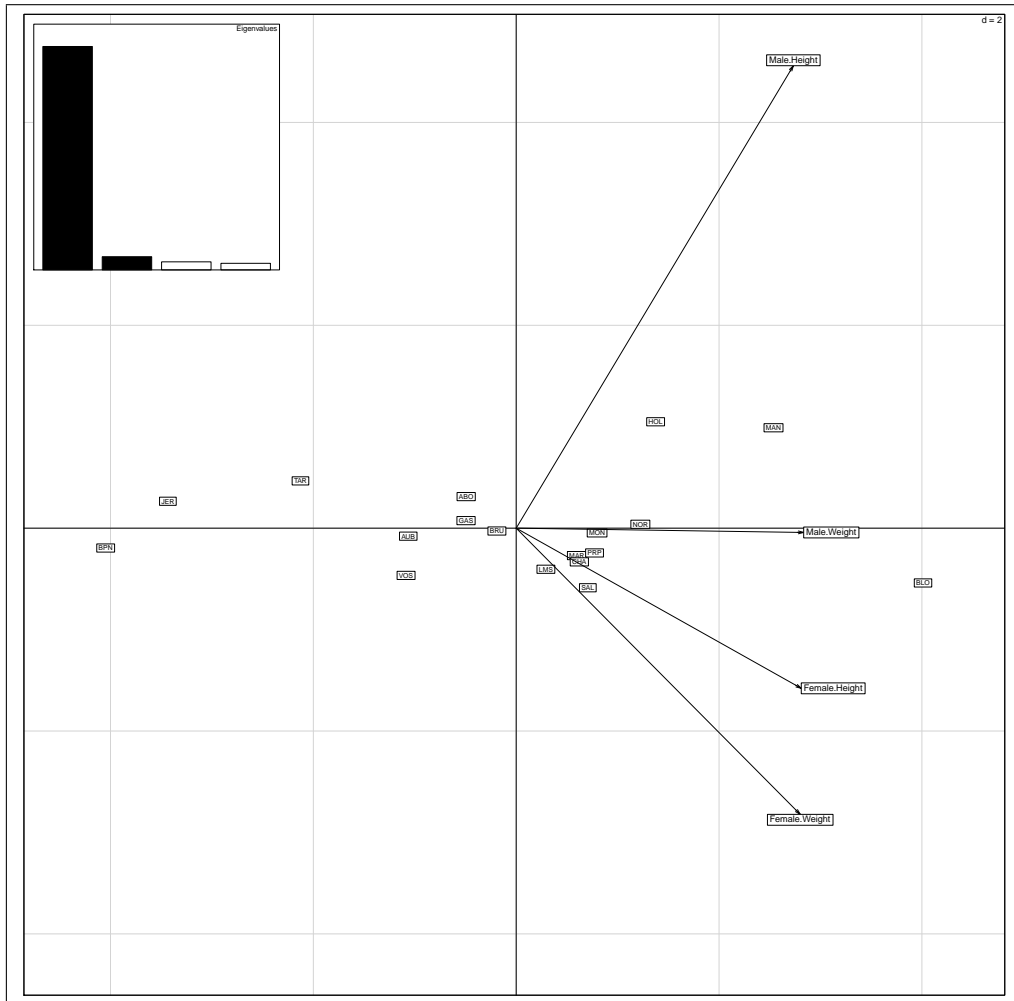

Figure S4.1: Biplot from the Principal Component Analysis of the four morphological traits at the 18 cattle breeds. The analyses were carried out with the R package *ade4* (Dray and Dufour, 2007).
