# Supplementary material
Source: PubMed Central journal article supplement (PMC4676524)
Supplement: supp_115.181453_FileS5.pdf [file supp_115.181453_FileS5.pdf]

## File S5. References for Figures S1-S16 and Tables S1-S2.

### References

- Bonhomme, M., C. Chevalet, B. Servin, S. Boitard, J. Abdallah, *et al.*, 2010 Detecting selection in population trees: the lewontin and krakauer test extended. *Genetics* 186: 241–262.
- Conrad, D. F., M. Jakobsson, G. Coop, X. Wen, J. D. Wall, *et al.*, 2006 A worldwide survey of haplotype variation and linkage disequilibrium in the human genome. *Nat Genet* 38: 1251–1260.
- Coop, G., D. Witonsky, A. D. Rienzo, and J. K. Pritchard, 2010 Using environmental correlations to identify loci underlying local adaptation. *Genetics* 185: 1411–1423.
- Förstner, W., and B. Moonen, 2003 A metric for covariance matrices. In *Geodesy-The Challenge of the 3rd Millennium*. Springer Berlin Heidelberg, 299–309.
- Günther, T., and G. Coop, 2013 Robust identification of local adaptation from allele frequencies. *Genetics* 195: 205–220.
