# Supplementary material
Source: PubMed Central journal article supplement (PMC4676524)
Supplement: supp_115.181453_TableS1.pdf [file supp_115.181453_TableS1.pdf]

| Analysis           | core model  | core model with $\Omega = \widehat{\Omega}_{\text{HSA}}^{\text{benv}}$ | STD model with $\Omega = \widehat{\Omega}_{\text{HSA}}^{\text{benv}}$ | AUX model with $\Omega = \widehat{\Omega}_{\text{HSA}}^{\text{benv}}$ |
|--------------------|-------------|------------------------------------------------------------------------|-----------------------------------------------------------------------|-----------------------------------------------------------------------|
| $ \beta_i  = 0.05$ | 2.90 (2.30) | 2.65 (1.65)                                                            | 0.75 (1.00)                                                           | 0.90 (0.95)                                                           |
| $ \beta_i  = 0.1$  | 36.3 (13.5) | 32.3 (4.80)                                                            | 0.65 (0.95)                                                           | 0.50 (0.85)                                                           |
| $ \beta_i  = 0.2$  | 100 (86.3)  | 99.2 (34.7)                                                            | 1.40 (1.15)                                                           | 1.40 (1.10)                                                           |

Table S1: True Positive Rates (TPR) at the 1% POD threshold as a function of the simulated  $|\beta_i|$  values for four different model parameterizations. TPR are given in % and were computed by combining results over the ten replicate data sets for each SpaH (and SpaB given in parenthesis) scenarios.
