# Supplementary material
Source: PubMed Central journal article supplement (PMC4676524)
Supplement: supp_115.181453_TableS2.pdf [file supp_115.181453_TableS2.pdf]

| Criterion                  | $\text{BF}_{\text{is}}$ | $\text{BF}_{\text{mc}}$ | $\text{eBP}_{\text{is}}$ | $\text{eBP}_{\text{mc}}$ |
|----------------------------|-------------------------|-------------------------|--------------------------|--------------------------|
| FPR                        | 0.01 (0.01)             | 0.13 (22.5)             | 0.17 (0.00)              | 0.03 (8.57)              |
| TPR ( $ \beta_i  = 0.05$ ) | 39.5 (1.00)             | 69.0 (72.1)             | 63.2 (0.00)              | 53.6 (49.8)              |
| TPR ( $ \beta_i  = 0.1$ )  | 99.6 (5.60)             | 99.9 (98.3)             | 99.7 (0.00)              | 99.8 (92.0)              |
| TPR ( $ \beta_i  = 0.2$ )  | 100 (58.6)              | 100 (100)               | 100 (0.75)               | 100 (99.9)               |

Table S2: True (TPR) and False (FPR) Positive Rates as a function of the decision criterion and the model parametrization (with  $\Omega = \widehat{\Omega}_{\text{HSA}}^{\text{benv}}$  for the SpaH and  $\Omega = \widehat{\Omega}_{\text{BTA}}^{\text{benv}}$  for the SpaB data sets respectively). The thresholds are set to 20 dB for both the  $\text{BF}_{\text{is}}$  and  $\text{BF}_{\text{mc}}$  Bayes Factors; and to  $10^{-3}$  for both the  $\text{eBP}_{\text{is}}$  and  $\text{eBP}_{\text{mc}}$  (empirical) Bayesian P-values. The true and false positive rates (given in %) are computed by combining results over the ten replicate data sets from the SpaH and SpaB (given in parenthesis) scenarios.
